# Supplementary material for: Mitral valve surgery for atrial functional mitral regurgitation: predicting recurrent mitral regurgitation and mid-term outcome
Source: PubMed Central journal article supplement (PMC9371988; doi:10.1007/s11748-022-01793-8), 2022-03-03
Supplement: 11748_2022_1793_MOESM4_ESM.pdf [file 11748_2022_1793_MOESM4_ESM.pdf]

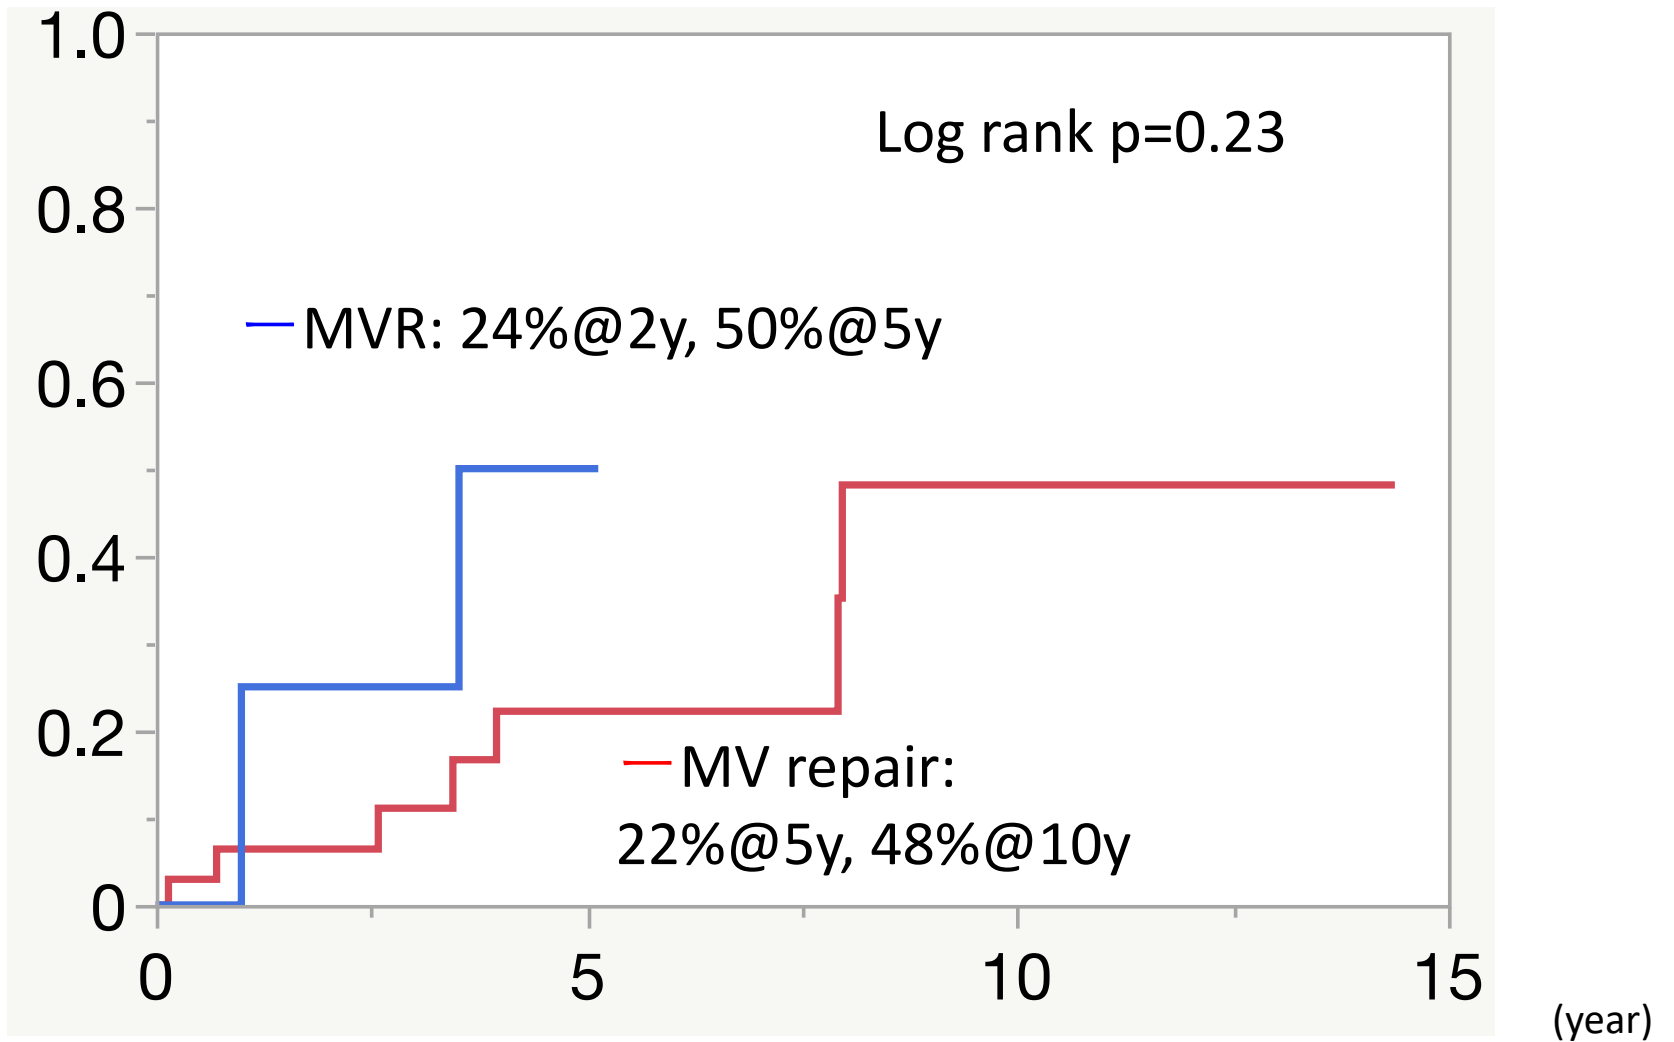

|           |    |    |   |    |
|-----------|----|----|---|----|
| MV repair | 35 | 19 | 9 | 74 |
| MVR       | 7  | 4  | 2 |    |
