# Supplementary material for: Mitral valve surgery for atrial functional mitral regurgitation: predicting recurrent mitral regurgitation and mid-term outcome
Source: Springer Nature journal article supplement (doi:10.1007/s11748-022-01793-8), 2022-03-03
Supplement: MOESM1 [file 20189062]

**Supplemental Table. Backgrounds and postoperative findings in the study group excluding patients with paroxysmal Afib**

|                                          | All            | MV repair    | MVR            | P value |
|------------------------------------------|----------------|--------------|----------------|---------|
| Number of patients                       | 42             | 35           | 7              |         |
| Age                                      | 71 (68.5-77.5) | 70 (66.5-75) | 73 (67.5-78.5) | 0.78    |
| Male                                     | 25 (59.5%)     | 22 (62.8%)   | 3 (42.8%)      | 0.55    |
| MR grade 4                               | 15 (%)         | 10 (24%)     | 5 (71%)        | 0.06    |
| LVDd (mm)                                | 58±9.4         | 57±7.4       | 62±8.2         | 0.21    |
| LVEDVI (ml/m <sup>2</sup> )              | 110±39         | 105±37       | 133±37         | 0.07    |
| LVDs (mm)                                | 39±7.7         | 37±6.8       | 43±8.7         | 0.17    |
| LVESVI (ml/m <sup>2</sup> )              | 45±20          | 39±16        | 57±21          | 0.04    |
| LA dimension (mm)                        | 65 (57-73)     | 65 (55-74)   | 63 (56-73)     | 0.92    |
| TRPG (mmHg)                              | 34±12          | 33±12        | 32±13          | 0.8     |
| EF (%)                                   | 67±11          | 70±7.8       | 67±7.7         | 0.21    |
| TR <sub>≥3</sub>                         | 17 (40%)       | 13 (31%)     | 4 (57%)        | 0.17    |
| Mitral annular dilation                  | 42 (100%)      | 35 (100%)    | 7 (100%)       | 1       |
| Posterior leaflet tethering              | 11 (26%)       | 7 (20%)      | 4 (57%)        | 0.03    |
| Postoperative echocardiographic findings |                |              |                |         |
| MR <sub>≥2</sub>                         | 0              | 0            | 0              |         |
| LVDd (mm)                                | 54 (49-60)     | 52±7.2       | 60±8.4         | 0.21    |
| LVDs (mm)                                | 39 (34-46)     | 38±7.4       | 48± 8.0        | 0.025   |
| LA dimension (mm)                        | 54 (44-61)     | 54±11        | 58±14          | 0.77    |
| TRPG (mmHg)                              | 23 (19-26)     | 23±8.1       | 24±4.2         | 0.93    |
| EF (%)                                   | 50 (40-60)     | 51±11        | 43±16          | 0.57    |
| Postoperative course                     |                |              |                |         |
| Hospital death                           | 1 (2.4%)       | 0            | 1 (14.2%)      | 0.04    |
| Respiratory failure                      | 2 (4.8%)       | 1 (2.8%)     | 1 (14.2%)      | 0.59    |
| Cerebrovascular event                    | 1 (2.4%)       | 1 (2.8%)     | 0              | 0.59    |
| Reexploration                            | 2 (4.8%)       | 1 (2.8%)     | 0              | 0.59    |
| Renal failure                            | 1 (2.4%)       | 1 (2.8%)     | 0              | 0.59    |
