# Supplementary material for: Mitral valve surgery for atrial functional mitral regurgitation: predicting recurrent mitral regurgitation and mid-term outcome
Source: Springer Nature journal article supplement (doi:10.1007/s11748-022-01793-8), 2022-03-03
Supplement: MOESM3 [file 20189062]

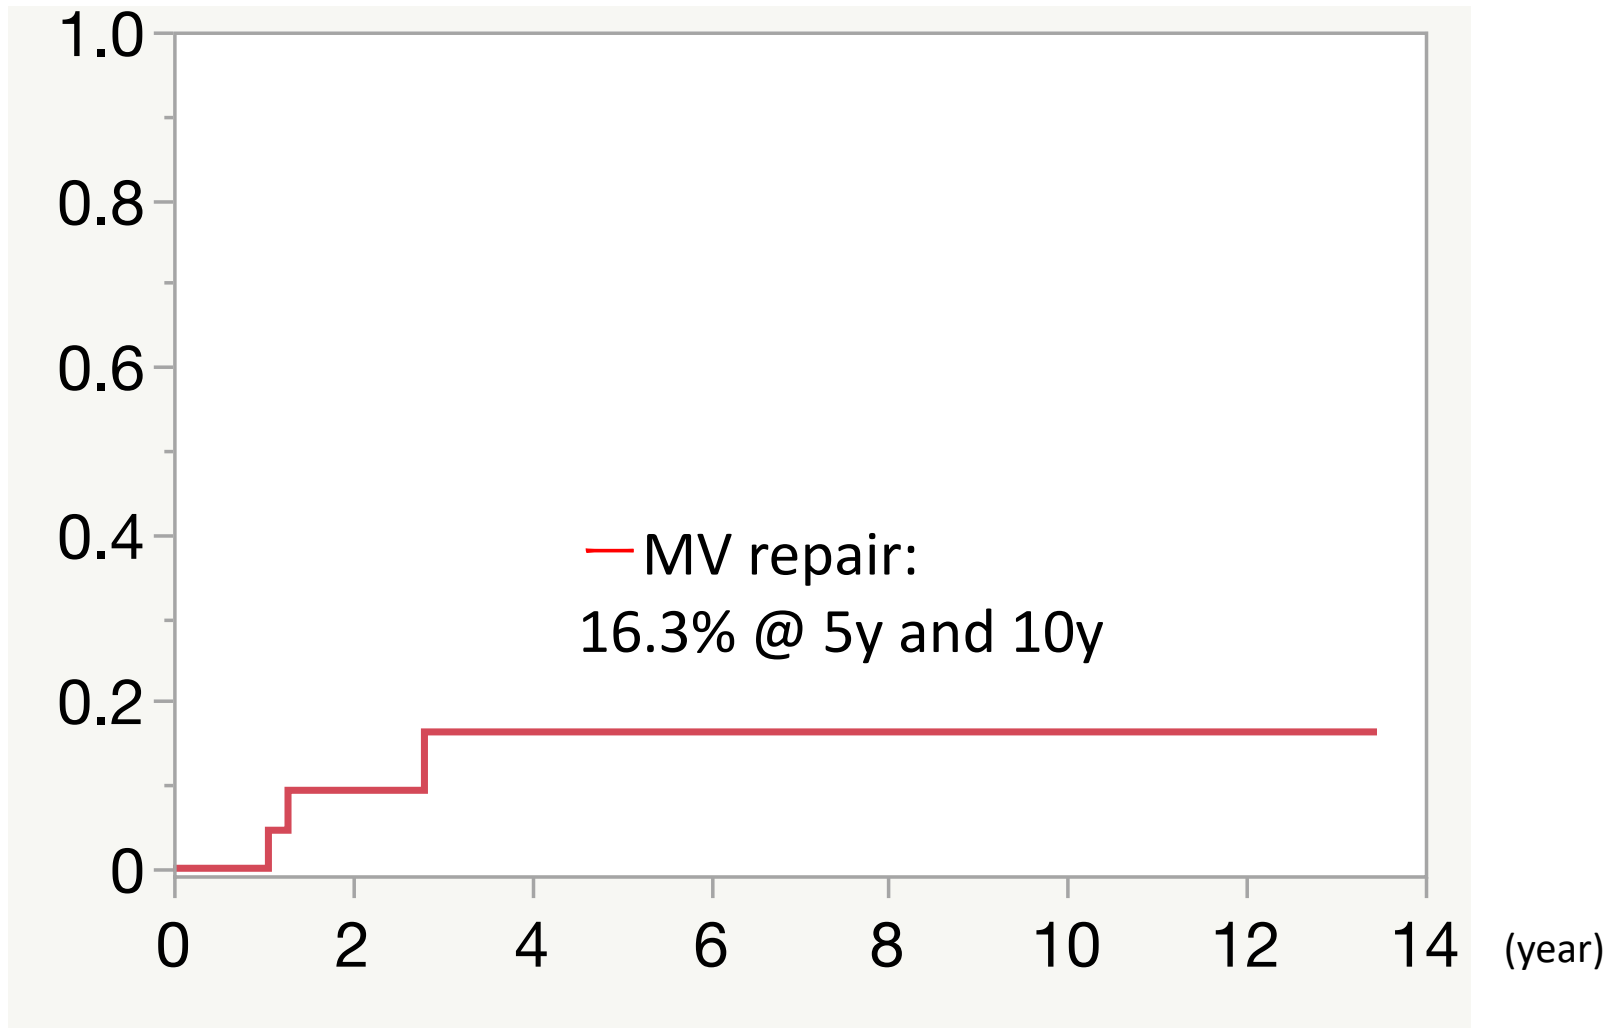

MV repair 35

11

8

4

4
